# Supplementary material for: Natural Rubber/Hexagonal Mesoporous Silica Nanocomposites as Efficient Adsorbents for the Selective Adsorption of (−)-Epigallocatechin Gallate and Caffeine from Green Tea
Source: MDPI journal article supplement (doi:10.3390/molecules28166019), 2023-08-11
Supplement: s1 [file s1]

## Supporting Information

### Natural rubber/hexagonal mesoporous silica nanocomposites as efficient adsorbents for the selective adsorption of (–)-epigallocatechin gallate and caffeine from green tea

Kamolwan Jermjun <sup>1</sup>, Rujeeluk Khumho <sup>2</sup>, Mookarin Thongoiam <sup>2</sup>, Satit Yousatit <sup>2</sup>, Toshiyuki Yokoi <sup>3</sup>, Chawalit Ngamcharussrivichai <sup>2,4,5</sup> and Sakdinun Nuntang <sup>1,\*</sup>

<sup>1</sup> Industrial Chemistry Innovation Program, Faculty of Science, Maejo University, Chiang Mai 50290, Thailand; kamol.nm@hotmail.com

<sup>2</sup> Department of Chemical Technology, Faculty of Science, Chulalongkorn University, Bangkok 10330, Thailand; rujeeluk\_fai\_@hotmail.com (R.K.); mookarinth@gmail.com (M.T.); y.satit@hotmail.com (S.Y.); chawalit.ng@chula.ac.th (C.N.)

<sup>3</sup> Chemical Resources Laboratory, Tokyo Institute of Technology, Yokohama 226-8503, Japan; yokoi@cat.res.titech.ac.jp

<sup>4</sup> Center of Excellence on Petrochemical and Materials Technology (PETROMAT), Chulalongkorn University, Bangkok 10330, Thailand

<sup>5</sup> Center of Excellence in Catalysis for Bioenergy and Renewable Chemicals (CBRC), Faculty of Science, Chulalongkorn University, Bangkok 10330, Thailand

\* Correspondence: sakdinun.nt@gmail.com

**Table S1.** Textural properties and water adsorption volumes of pure-silica HMS and NR/HMS nanocomposites

| Sample <sup>a</sup> | $S_{\text{BET}}^{\text{b}}$<br>( $\text{m}^2 \text{g}^{-1}$ ) | $D_{\text{p}}^{\text{c}}$<br>( $\text{nm}$ ) | $V_{\text{t}}^{\text{d}}$<br>( $\text{cm}^3 \text{g}^{-1}$ ) | $V_{\text{m}}^{\text{e}}$<br>( $\text{cm}^3 \text{g}^{-1}$ ) |
|---------------------|---------------------------------------------------------------|----------------------------------------------|--------------------------------------------------------------|--------------------------------------------------------------|
| HMS- $C_{10}$       | 781                                                           | 2.49                                         | 1.04                                                         | 67.20                                                        |
| HMS- $C_{12}$       | 692                                                           | 2.89                                         | 1.10                                                         | 64.97                                                        |
| HMS- $C_{14}$       | 677                                                           | 3.46                                         | 1.40                                                         | 62.91                                                        |

|                  |     |      |      |       |
|------------------|-----|------|------|-------|
| NR/HMS- $C_{10}$ | 638 | 2.12 | 1.34 | 42.90 |
| NR/HMS- $C_{12}$ | 661 | 2.37 | 1.44 | 44.76 |
| NR/HMS- $C_{14}$ | 668 | 2.82 | 1.04 | 46.56 |

---

<sup>a</sup>Extracted samples

<sup>b</sup>BET surface area

<sup>c</sup>Pore diameter, calculated by BJH method

<sup>d</sup>Total pore volume, determined by volume adsorbed at  $P/P_0 = 0.99$

<sup>e</sup>Monolayer adsorption volume at standard temperature and pressure, determined from H<sub>2</sub>O adsorption–desorption measurement

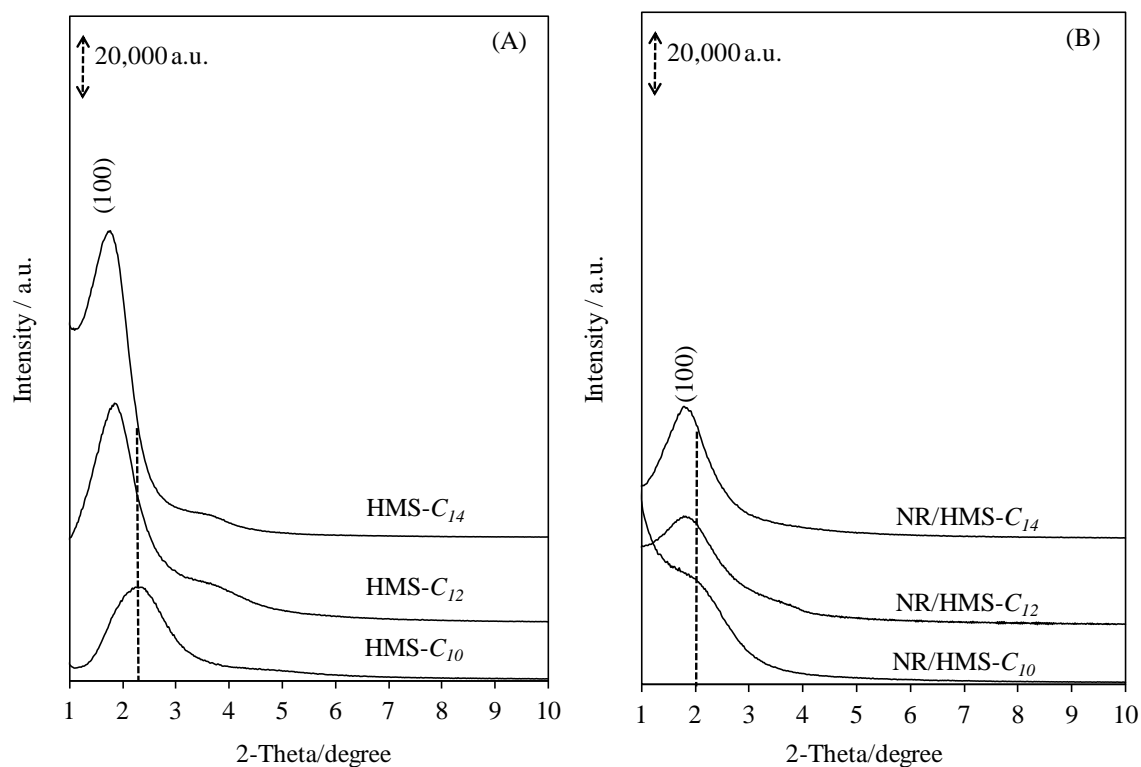

**Figure S1.** XRD patterns of (A) pure-silica HMS materials and (B) NR/HMS nanocomposites.

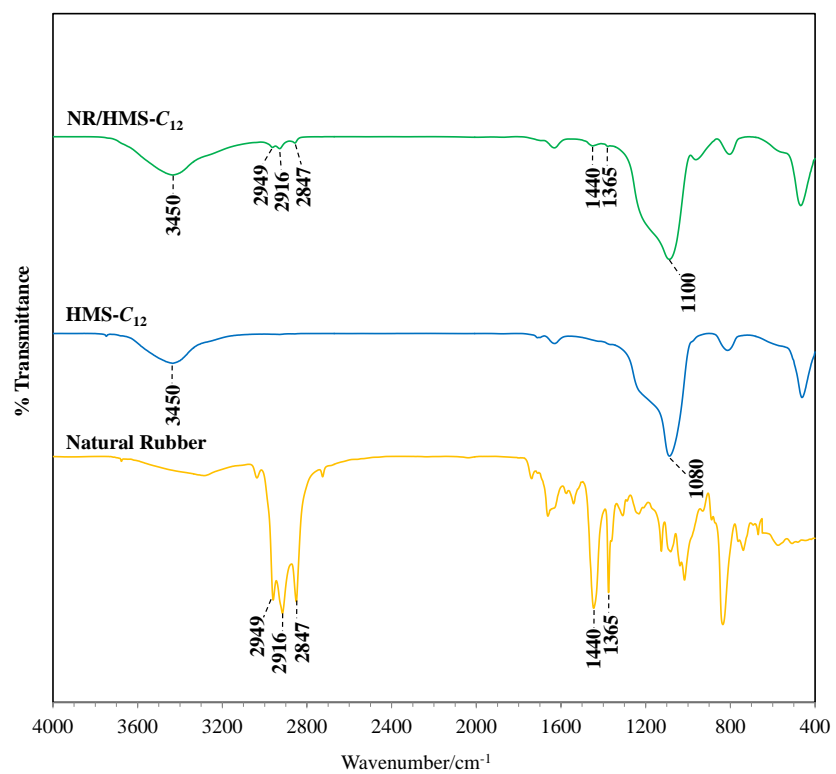

**Figure S2.** FTIR spectra of Natural Rubber, (b) HMS- $C_{12}$  and (c) NR/ HMS- $C_{12}$  composite.

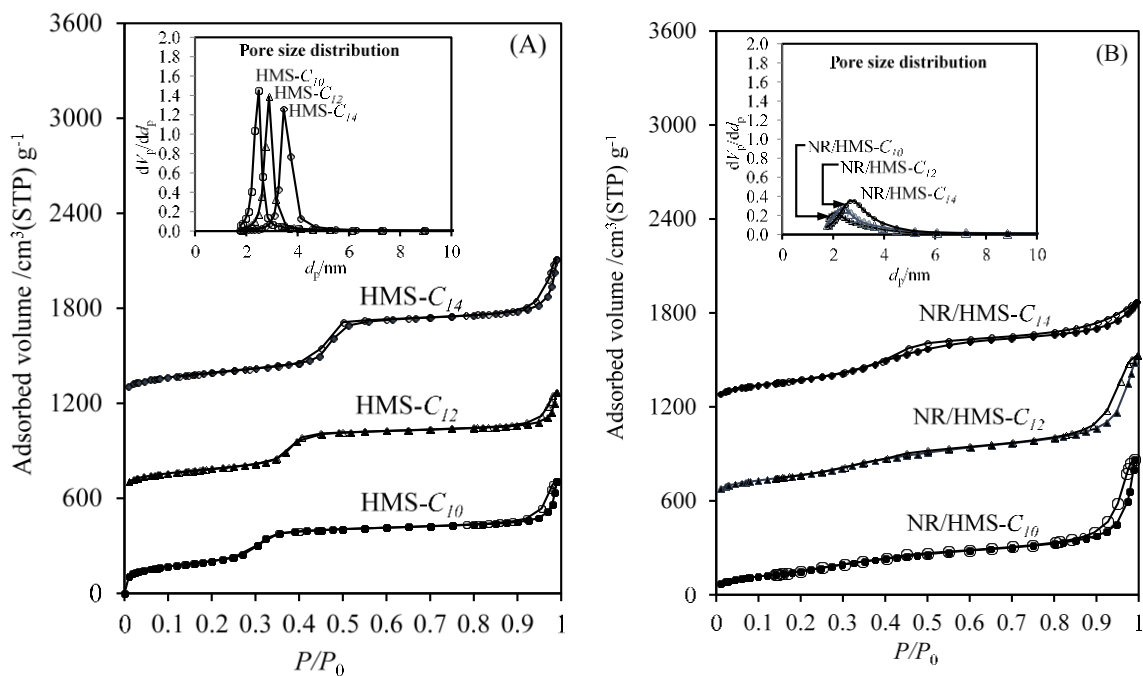

**Figure S3.**  $N_2$  adsorption-desorption isotherms and BJH pore size distribution of (A) pure-silica HMS materials and (B) NR/HMS nanocomposites.

- *Adsorption study*

Equation (S1) was used to calculate the adsorption capacity ( $q_e$ ).

Adsorption capacity:

$$q_e = \frac{(C_0 - C_e)V_i}{W} \quad (S1)$$

where  $q_e$  is adsorption capacity at adsorption equilibrium (mg/g<sub>dried adsorbent</sub>);  $C_0$  and  $C_e$  are the initial and equilibrium concentrations, respectively, of EGCG or CAF in the solution (mg/L);  $V_i$  is the volume of the initial solution (mL); and  $W$  is the weight of the dried adsorbent (g).

- *Kinetic models*

Pseudo-first-order, pseudo-second-order, and intraparticle diffusion kinetic models of the experiment data were evaluated according to Eqs. (S2)–(S4) to postulate the mechanism of EGCG and CAF adsorption on the synthesized adsorbents.

Pseudo-first-order model:

$$q_t = q_e (1 - e^{-K_1 t}), \quad (S2)$$

pseudo-second-order model:

$$q_t = K_2 \frac{q_e^2 t}{1 + K_2 q_e t} \quad (S3)$$

intraparticle diffusion model:

$$q_t = K_p t^{0.5}, \quad (S4)$$

where  $q_t$  is the adsorption capacity at any time (mg/g dried adsorbent);  $K_1$  (/min) and  $K_2$  (g/(mg min)) are the rate constants of the pseudo-first-order and pseudo-second-order models, respectively;  $K_p$  is the intraparticle diffusion rate constant (mg/g min<sup>1/2</sup>).

- *Desorption study*

Equations (S5) and (S6) were used to calculate the desorption capacity and desorption ratio.

Desorption capacity:

$$q_d = \frac{C_d V_d}{W} \quad (S5)$$

desorption ratio:

$$D = \frac{C_d V_d}{(C_o - C_e) V_i} \times 100\% \quad (S6)$$

where  $q_d$  is the desorption capacity after adsorption equilibrium (mg/g<sub>dried adsorbent</sub>);  $C_d$  is the concentration of EGCG or CAF in the desorption solution (mg/L);  $V_i$  and  $V_d$  are the volumes of the initial and desorption solution (mL), respectively;  $D$  is the desorption ratio; and  $W$  is the weight of the dry adsorbent (g).
